# Supplementary material for: Multiepitope Subunit Peptide-Based Nanovaccine against Porcine Circovirus Type 2 (PCV2) Elicited High Antibody Titers in Vaccinated Mice
Source: MDPI journal article supplement (doi:10.3390/molecules28052248), 2023-02-28
Supplement: s1 [file s1]

*Supplementary Materials*

# **Multiepitope Subunit Peptide-Based Nanovaccine against Por-Cine Circovirus Type 2 (PCV2) Elicited High Antibody Titers in Vaccinated Mice**

**Viet Tram Duong <sup>1</sup>, Prashamsa Koirala <sup>1</sup>, Sung-Po R. Chen <sup>2</sup>, Michael J. Monteiro <sup>2</sup>, Mariusz Skwarczynski <sup>1,\*</sup> and Istvan Toth <sup>1,3,\*</sup>**

<sup>1</sup> School of Chemistry and Molecular Biosciences, The University of Queensland, St Lucia, QLD 4072, Australia

<sup>2</sup> Australian Institute of Bioengineering and Nanotechnology, The University of Queensland, St Lucia, QLD 4072, Australia

<sup>3</sup> School of Pharmacy, The University of Queensland, Woolloongabba, QLD 4102, Australia

\* Correspondence: m.skwarczynski@uq.edu.au (M.S.); i.toth@uq.edu.au (I.T.)

### Peptide 1

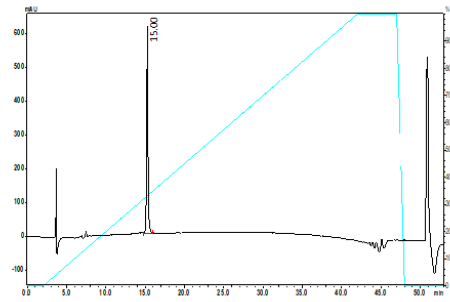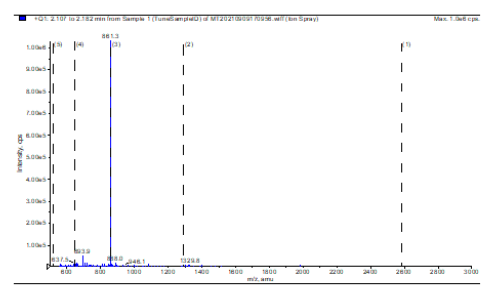

Peptide P1

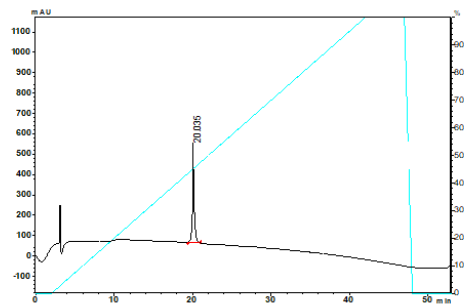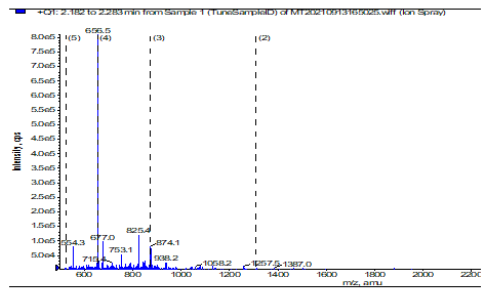

Peptide P2

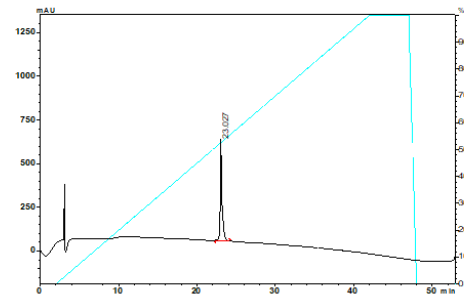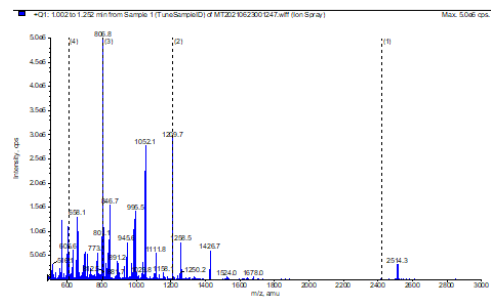

Peptide P3

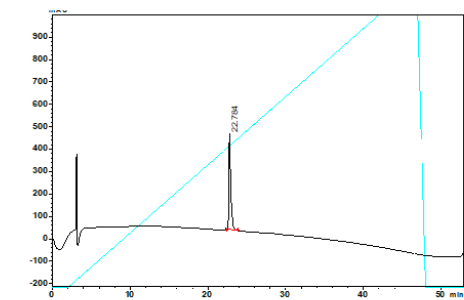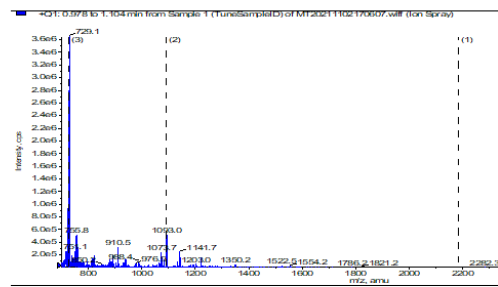

Peptide P4

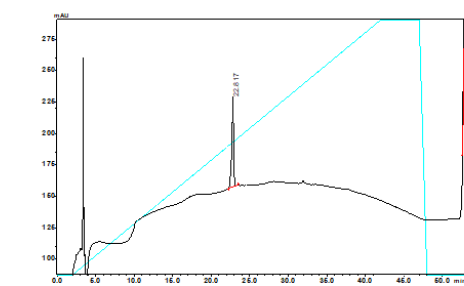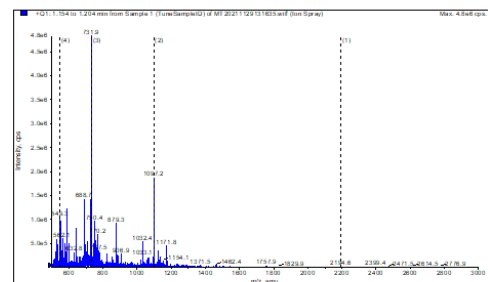

### Conjugate 9

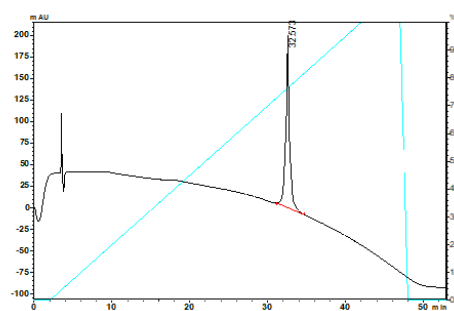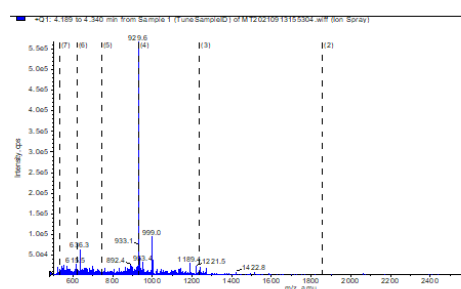

### Conjugate 10

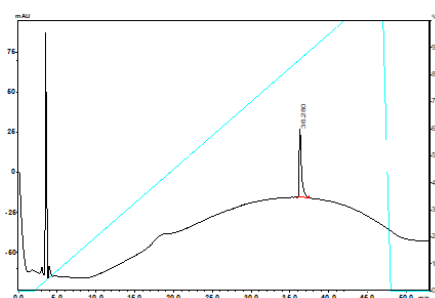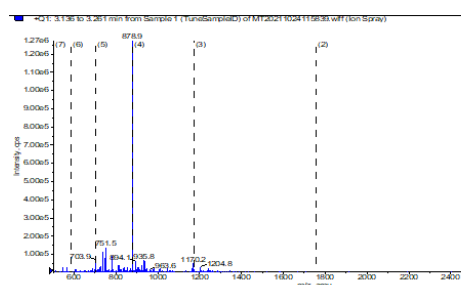

### Conjugate 11

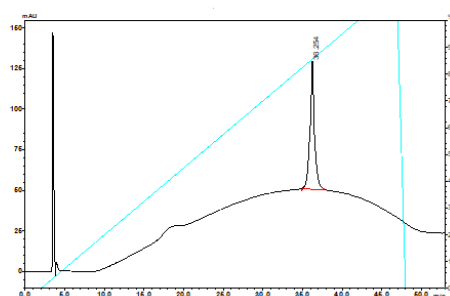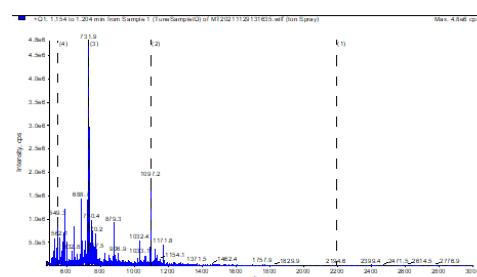

### Conjugate 12

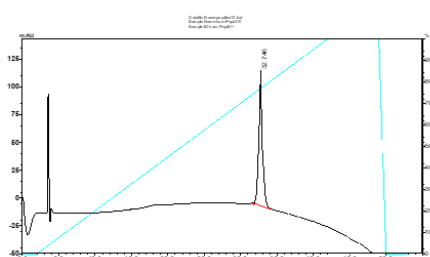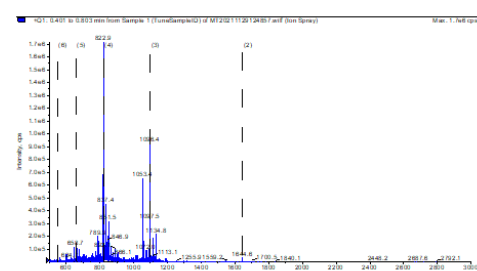

**Figure S1.** HPLC and ESI-MS spectra of 1–4, P1-P4 and 9–12.

**V1**

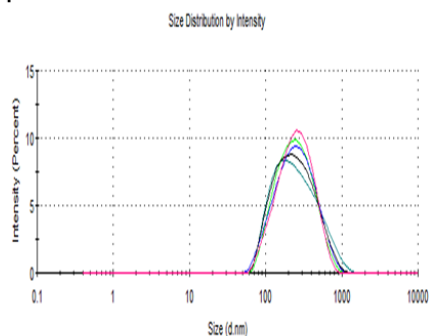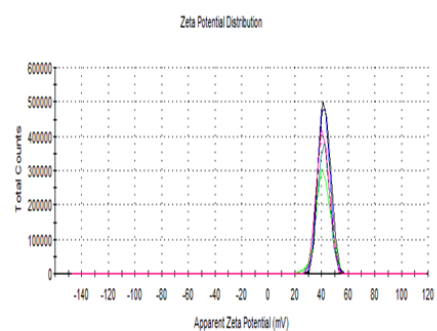

**V2**

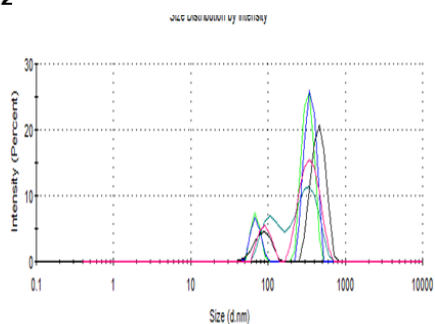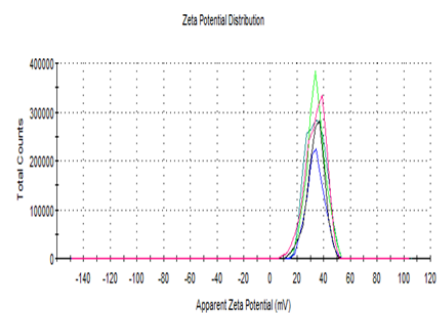

**V3**

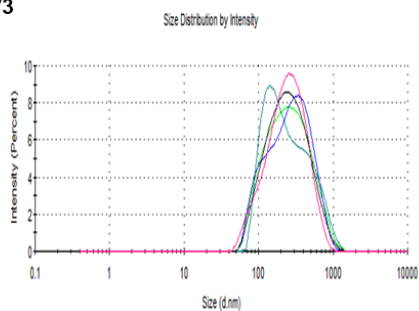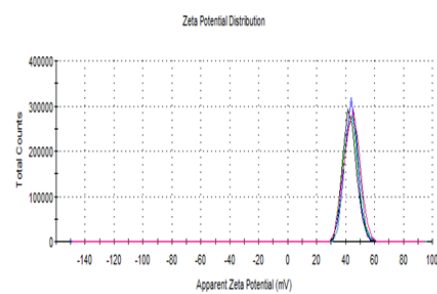

**V4**

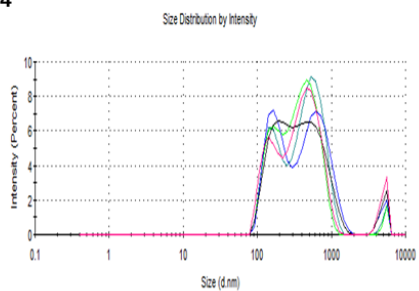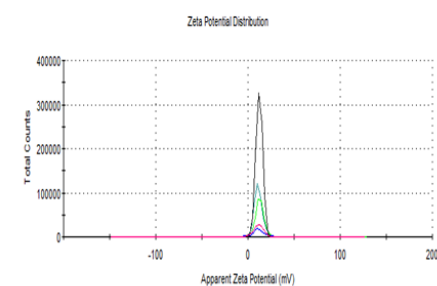

**Figure S2.** DLS spectra of vaccine candidates **V1-V4** (size distribution by intensity and zeta potential).

### Conjugate 5

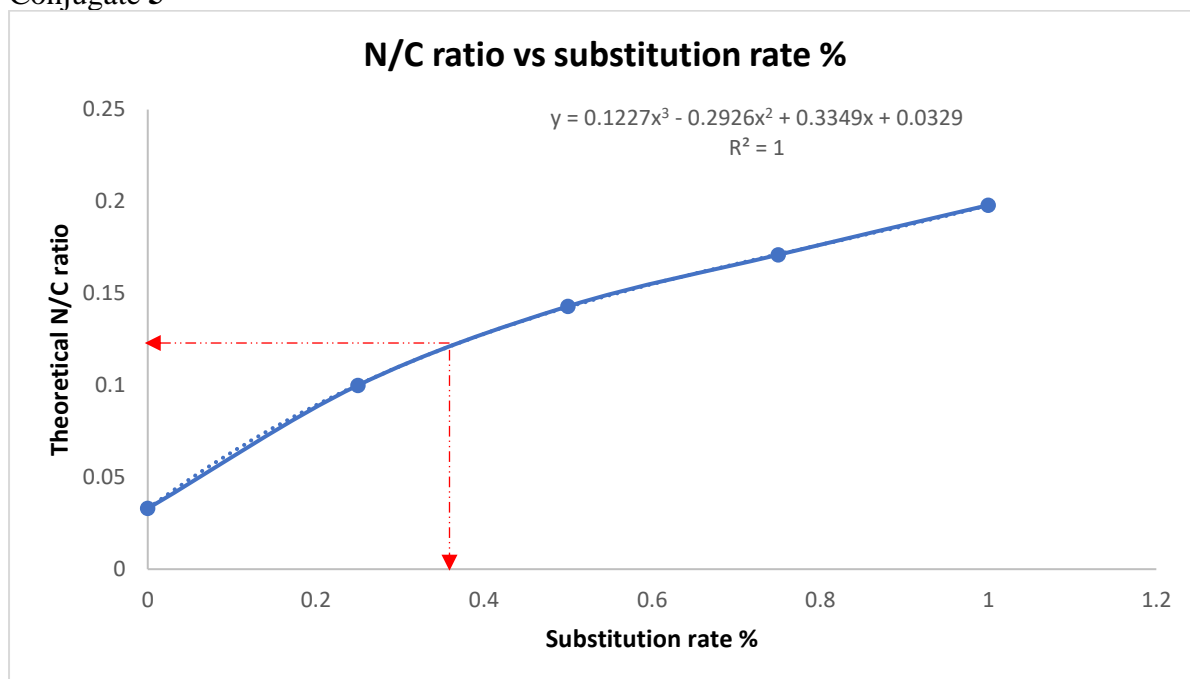

### Conjugate 6

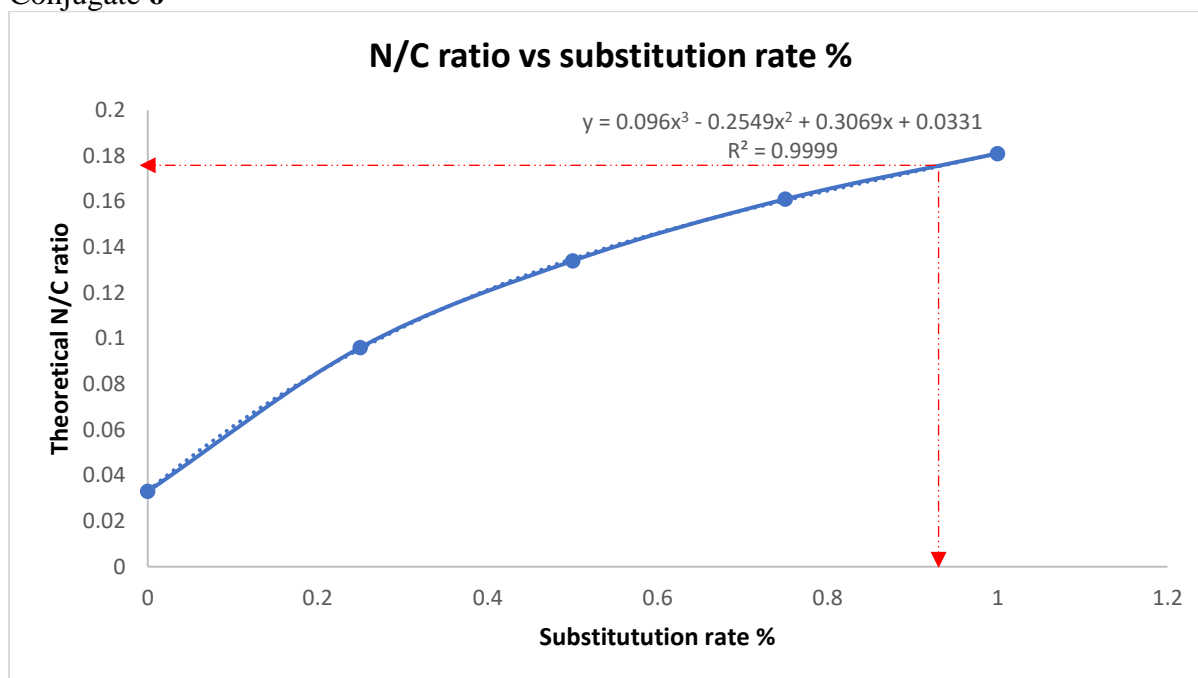

### Conjugate 7

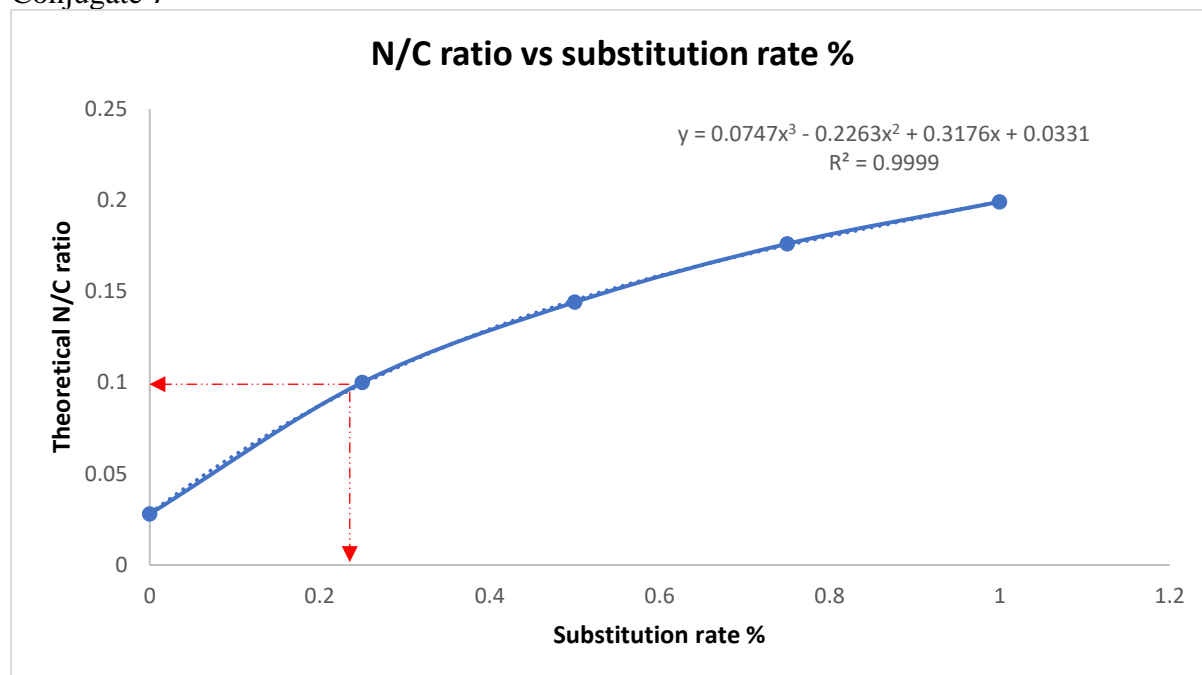

### Conjugate 8

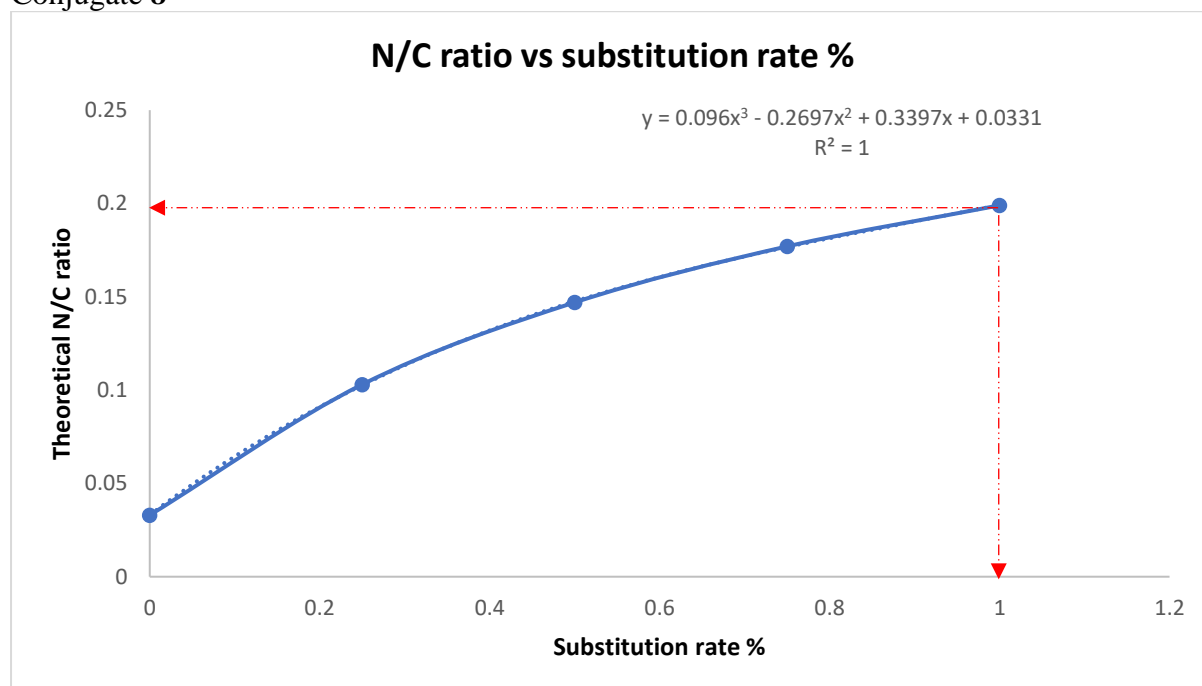

**Figure S3.** The curve of the theoretical substitution ratio (1 = 100%, horizontal axis) of peptide **P1-P4** to PMA in conjugates **5-8** versus N/C ratio (nitrogen carbon ratio of elemental analysis) of conjugates (vertical axis). Experimentally determined N/C by elemental analysis: 0.124 (**5**), 0.170 (**6**), 0.091 (**7**), and 0.204 (**8**).
